# Supplementary material
Source: PubMed Central journal article supplement (PMC3817546)
Supplement: cr2013126x1.pdf [file cr2013126x1.pdf]

Fig S1

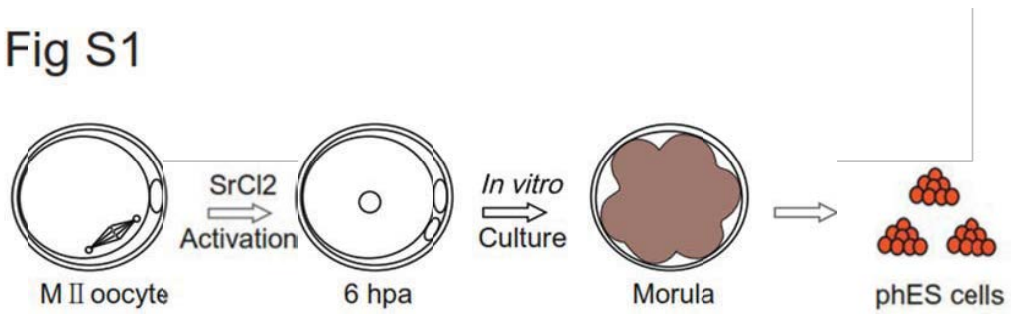

Figure S1. A schematic representation of parthenogenetic haploid ES cells derivation. hpa, hours post activation.
