# Supplementary material
Source: PubMed Central journal article supplement (PMC3817546)
Supplement: cr2013126x2.pdf [file cr2013126x2.pdf]

Table S1. Derivation of parthenogenetic haploid ES cell lines.

| Experiment no. | Derivation medium | Names of ES cells       | Genetic background | Oocytes activated | No. of morulas | ES cell lines obtained |         |
|----------------|-------------------|-------------------------|--------------------|-------------------|----------------|------------------------|---------|
|                |                   |                         |                    |                   |                | Diploid                | Haploid |
| 1              | KSR/2i            | phGFP-1,<br>phGFP-2     | C57BL/6            | 22                | 10             | 2                      | 2       |
| 2              | KSR/2i            | phGFP-3 to<br>phGFP-6   | C57BL/6            | 34                | 17             | 1                      | 4       |
| 3              | KSR/2i            | phGFP-7 to<br>phGFP-9   | C57BL/6            | 30                | 13             | 1                      | 3       |
| 4              | KSR/2i            | phES OG-1,<br>phES OG-2 | C57BL/6×C<br>D1    | 30                | 14             | 4                      | 2       |

KSR, knockout serum replacement.

2i: GSK3 inhibitor CHIR99021, MEK inhibitor PD0325901.
