# Supplementary material
Source: PubMed Central journal article supplement (PMC3817546)
Supplement: cr2013126x4.pdf [file cr2013126x4.pdf]

Fig S3

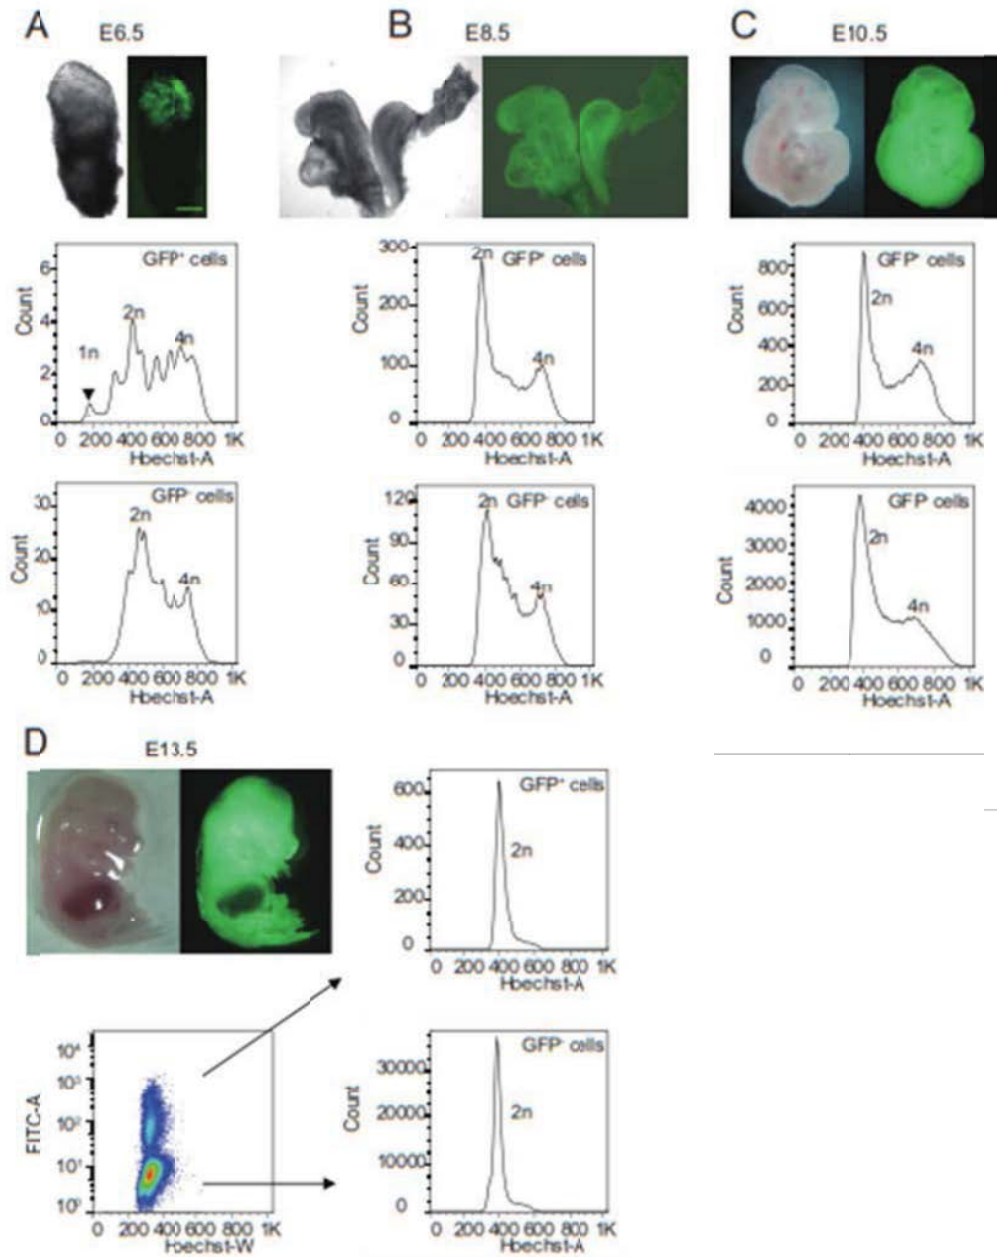

Figure S3. Pluripotency and diploidization of mouse phES cells (phGFP-3). Flow cytometric analysis of DNA content of EGFP-positive and EGFP-negative cells isolated from E6.5 (A), E8.5 (B), E10.5 (C) and E13.5 (D) chimaeric fetuses, which were generated by injecting phGFP-3 haploid cells into CD-1 diploid blastocysts. Scale bar, 100  $\mu$ m.
