# Supplementary material
Source: PubMed Central journal article supplement (PMC3817546)
Supplement: cr2013126x5.pdf [file cr2013126x5.pdf]

Table S2. Pluripotency and diploidization of mouse phES cells.

| Cell line     | No. of injected blastocysts | No. of arrested <10.5 | No. of EGFP positive chimeric embryos at |      |       | No. of germline contribution at E13.5 | No. of newborn pups | No. of chimeric pups | Coat color chimerism (%) |
|---------------|-----------------------------|-----------------------|------------------------------------------|------|-------|---------------------------------------|---------------------|----------------------|--------------------------|
|               |                             |                       | E6.5                                     | E8.5 | E10.5 |                                       |                     |                      |                          |
| *phGFP-1      | 51                          | 24                    | 2/5                                      | /    | /     | /                                     | /                   | /                    | /                        |
| *phGFP-3      | 30                          | 12                    | 2/7                                      | /    | /     | /                                     | /                   | /                    | /                        |
| **phGFP-2     | 64                          | 35                    | /                                        | 2/12 | /     | /                                     | /                   | /                    | /                        |
| ***phGFP-1    | 60                          | 22                    | /                                        | /    | 2/11  | /                                     | /                   | /                    | /                        |
| ****phES OG-1 | 87                          | 20                    | /                                        | /    | /     | 2/38                                  | /                   | /                    | /                        |
| phES OG-1     | 15                          | /                     | /                                        | /    | /     | /                                     | 10                  | 2                    | 35                       |
| phGFP-3       | 30                          | /                     | /                                        | /    | /     | /                                     | 10                  | 1                    | 25                       |
| phGFP-1       | 71                          | /                     | /                                        | /    | /     | /                                     | 8                   | 3                    | 50                       |

\* Chimaeric embryos dissected at E6.5, two of five chimaeric embryos contained EGFP from injecting phGFP-1, and two of seven chimaeric embryos contained EGFP from injecting phGFP-3.

\*\* Chimaeric embryos dissected at E8.5, two of twelve chimaeric embryos contained EGFP positive cells from injecting phGFP-2.

\*\*\* Chimaeric embryos dissected at E10.5, two of eleven chimaeric embryos contained EGFP positive cells from injecting phGFP-1.

\*\*\*\* Chimaeric embryos dissected at E13.5, two of thirty eight chimaeric embryos contained Oct4-EGFP positive cells within the dissected gonads.
