# Supplementary material
Source: PubMed Central journal article supplement (PMC3817546)
Supplement: cr2013126x7.pdf [file cr2013126x7.pdf]

Fig S5

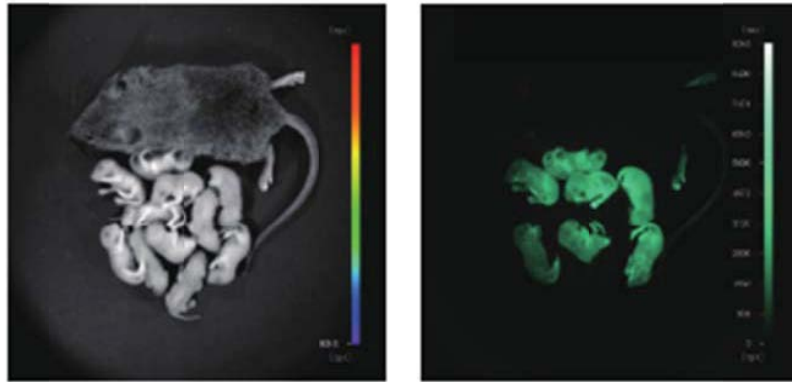

Figure S5. The ICPI mouse generated by intracytoplasmic phES cells (phGFP-3) injection and its progeny. Fluorescence detection (right) under NightOWL II.
