# Supplementary material
Source: PubMed Central journal article supplement (PMC3817546)
Supplement: cr2013126x8.pdf [file cr2013126x8.pdf]

Table S3. Primers used in PCR analysis.

| Category                        | Gene   | Primes (5' to 3')                                                                                                     |
|---------------------------------|--------|-----------------------------------------------------------------------------------------------------------------------|
| Q-PCR                           | Oct4   | Forward: TCTTCCACCAGGCCCGGCTC<br>Reverse: TGCGGGCGGACATGGGGAGATCC                                                     |
|                                 | Nanog  | Forward: AGGATGAAGTGCAAGCGGTG<br>Reverse: GGGATAGCTGCAATGGATGC                                                        |
|                                 | Sox2   | Forward: TGCCTCTTAAAGACTAGGGC<br>Reverse: TCTGGCGGAGAATAGTTGG                                                         |
|                                 | Klf4   | Forward: CCATCGGACCTACTTATCTGC<br>Reverse: AAAACCTCAAACCAAACCC                                                        |
|                                 | Stella | Forward: GGAAGTTCAAAGCGCCTTTC<br>Reverse: ACTCATTTCCTTCGAGCCTTTTT                                                     |
|                                 | Gapdh  | Forward: AGGTCGGTGTGAACGGATTTG<br>Reverse: TGTAGACCATGTAGTTGAGGTCA                                                    |
| DMR<br>Bisulphite<br>sequencing | H19    | Forward:<br>TATGAGTATTTAGGAGGTATAAGAATT<br>Reverse:<br>TTTTATCAAAAATAACATAAACCCCT<br>1 <sup>st</sup> PCR round        |
|                                 |        | Forward:<br>TGTAAGGAGATTATGTTTTATTTTTGG<br>Reverse:<br>CCCTAACCTCATAAAACCCATAACTAT<br>2 <sup>nd</sup> PCR round       |
|                                 | Snrpn  | Forward:<br>TATGTAATATGATATAGTTTAGAAATTAGT<br>Reverse:<br>AATAAACCCAAATCTAAAATATTTTAATCA<br>1 <sup>st</sup> PCR round |
|                                 |        | Forward:<br>AATTTGTGTGATGTTTGTAATTATTTGG<br>Reverse:<br>ATAAAAATACACTTTCACACTACTAAAAT<br>2 <sup>nd</sup> PCR round    |
